# Supplementary material
Source: publisher figshare collection journal article supplement (https://asha.figshare.com/articles/dataset/_/14963937)
Supplement: Supplementary file 1 [file 1]

**Supplemental Table SM2.** Demographic information for the original sample, the sample in the early LGC model, and the follow-up subsamples.

|                                                         | Original sample | Early LGC model | Follow-up 2 years | Follow-up 3 years | Follow up 4;7 | Follow-up 5;3 | Follow-up first grade  |
|---------------------------------------------------------|-----------------|-----------------|-------------------|-------------------|---------------|---------------|------------------------|
| <i>N</i>                                                | 508             | 427             | 104               | 111               | 253           | 102           | 236                    |
| Males/females, %                                        | 50.2/49.8       | 50.8/49.2       | 54.8/45.2         | 56.8/43.2         | 51.4/48.6     | 52.0/48.0     | 51.7/48.3              |
| Preterm birth (< 36 wk), <i>n</i> (%)                   | 14 (2.9)        | 14 (3.4)        | 3 (2.9)           | 5 (4.5)           | 6 (2.4)       | 3 (2.9)       | 6 (2.6)                |
| Birth weight, <i>M</i> ( <i>SD</i> ), kg                | 3.5 (0.6)       | 3.5 (0.6)       | 3.6 (0.6)         | 3.6 (0.6)         | 3.5 (0.5)     | 3.5 (0.6)     | 3.6 (0.5)              |
| Birth order, first born, <i>n</i> (%)                   | 267 (56.6)      | 216 (54.8)      | 49 (50.0)         | 51 (48.6)         | 134 (57.8)    | 50 (51.0)     | 115 (52.5)             |
| Single parents, <sup>a</sup> <i>n</i> (%)               | 19 (3.9)        | 15 (3.6)        | 2 (2)             | 3 (2.7)           | 7 (2.9)       | 0 (0)         | 5 (2.1)                |
| Parent’s education, <sup>a</sup> <i>M</i> ( <i>SD</i> ) |                 |                 |                   |                   |               |               |                        |
| Mother                                                  | 3.9 (2.0)       | 3.8 (1.9)       | 4.1 (1.8)         | 4.1 (1.9)         | 3.9 (1.9)     | 4.1 (2.0)     | 4.1 (1.9) <sup>b</sup> |
| Father                                                  | 3.6 (2.0)       | 3.6 (1.8)       | 3.5 (1.8)         | 3.8 (1.7)         | 3.6 (1.9)     | 3.8 (1.8)     | 3.6 (1.8)              |
| Parent’s age <sup>a</sup> <i>M</i> ( <i>SD</i> ), y     |                 |                 |                   |                   |               |               |                        |
| Mother                                                  | 29.8 (5.4)      | 29.7 (5.4)      | 30.4 (5.1)        | 30.6 (5.2)        | 30.0 (5.3)    | 30.9 (5.2)    | 30.4 (5.2)             |
| Father                                                  | 32.1 (6.3)      | 32.0 (6.4)      | 32.5 (6.0)        | 32.7 (5.7)        | 32.3 (6.1)    | 32.5 (5.8)    | 32.4 (6.3)             |

*Note.* Coverage of the demographic data varied between 472–494 in the original sample, 394–416 in the early LGC model sample, 98–104 at 24 months, 105–111 at 36 months, 232–249 at 55 months, 98–102 at 63 months, and 219–235 in the first grade. The percentages are calculated from the available data. LGC = latent growth curve.

<sup>a</sup>At time of initial recruitment. <sup>b</sup>Significantly different compared to the original sample ( $p < .01$ ).
