# Supplementary material
Source: publisher figshare collection journal article supplement (https://asha.figshare.com/articles/dataset/_/14963937)
Supplement: Supplementary file 2 [file 1]

**Supplemental Table SM3.** Correlations between the ITC composites at different ages.

|       |          | Soc06   | Soc09   | Soc12   | Soc15   | Soc18   | Spe06   | Spe09   | Spe12   | Spe15   | Spe18   | Sym06   | Sym09   | Sym12   | Sym15   |
|-------|----------|---------|---------|---------|---------|---------|---------|---------|---------|---------|---------|---------|---------|---------|---------|
| Soc09 | <i>r</i> | .471*** |         |         |         |         |         |         |         |         |         |         |         |         |         |
|       | <i>n</i> | 202     |         |         |         |         |         |         |         |         |         |         |         |         |         |
| Soc12 | <i>r</i> | .386*** | .560*** |         |         |         |         |         |         |         |         |         |         |         |         |
|       | <i>n</i> | 142     | 135     |         |         |         |         |         |         |         |         |         |         |         |         |
| Soc15 | <i>r</i> | .302*** | .477*** | .619*** |         |         |         |         |         |         |         |         |         |         |         |
|       | <i>n</i> | 151     | 142     | 277     |         |         |         |         |         |         |         |         |         |         |         |
| Soc18 | <i>r</i> | .278*** | .404*** | .594*** | .721*** |         |         |         |         |         |         |         |         |         |         |
|       | <i>n</i> | 149     | 140     | 234     | 246     |         |         |         |         |         |         |         |         |         |         |
| Spe06 | <i>r</i> | .304*** | .236*** | .182*   | .070    | .115    |         |         |         |         |         |         |         |         |         |
|       | <i>n</i> | 229     | 202     | 142     | 151     | 149     |         |         |         |         |         |         |         |         |         |
| Spe09 | <i>r</i> | .225*** | .281*** | .162    | .220**  | .148    | .340*** |         |         |         |         |         |         |         |         |
|       | <i>n</i> | 202     | 203     | 135     | 142     | 140     | 202     |         |         |         |         |         |         |         |         |
| Spe12 | <i>r</i> | .220**  | .406*** | .439*** | .342*** | .403*** | .257**  | .484*** |         |         |         |         |         |         |         |
|       | <i>n</i> | 142     | 135     | 322     | 277     | 234     | 142     | 135     |         |         |         |         |         |         |         |
| Spe15 | <i>r</i> | .099    | .216**  | .345*** | .431*** | .385*** | .180*   | .425*** | .529*** |         |         |         |         |         |         |
|       | <i>n</i> | 151     | 142     | 276     | 304     | 246     | 151     | 142     | 276     |         |         |         |         |         |         |
| Spe18 | <i>r</i> | .098    | .203*   | .330*** | .380*** | .384*** | .132    | .407*** | .468*** | .786*** |         |         |         |         |         |
|       | <i>n</i> | 149     | 140     | 234     | 246     | 279     | 149     | 140     | 234     | 246     |         |         |         |         |         |
| Sym06 | <i>r</i> | .509*** | .368*** | .188*   | .109    | .099    | .369*** | .256*** | .168*   | .072    | .086    |         |         |         |         |
|       | <i>n</i> | 229     | 202     | 142     | 151     | 149     | 229     | 202     | 142     | 151     | 149     |         |         |         |         |
| Sym09 | <i>r</i> | .352*** | .493*** | .419*** | .322*** | .250**  | .278*** | .389*** | .385*** | .274*** | .289*** | .402*** |         |         |         |
|       | <i>n</i> | 202     | 203     | 135     | 142     | 140     | 202     | 203     | 135     | 142     | 140     | 202     |         |         |         |
| Sym12 | <i>r</i> | .181*   | .309*** | .501*** | .445*** | .334*** | .250**  | .251**  | .443*** | .388*** | .339*** | .189*   | .496*** |         |         |
|       | <i>n</i> | 142     | 135     | 322     | 277     | 234     | 142     | 135     | 322     | 276     | 234     | 142     | 135     |         |         |
| Sym15 | <i>r</i> | .156    | .287*** | .466*** | .530*** | .386*** | .149    | .234**  | .339*** | .477*** | .406*** | .067    | .457*** | .666*** |         |
|       | <i>n</i> | 151     | 142     | 277     | 305     | 246     | 151     | 142     | 277     | 304     | 246     | 151     | 142     | 277     |         |
| Sym18 | <i>r</i> | .157    | .366*** | .482*** | .553*** | .487*** | .138    | .284*** | .363*** | .429*** | .465*** | -.009   | .331*** | .501*** | .683*** |
|       | <i>n</i> | 149     | 140     | 234     | 246     | 279     | 149     | 140     | 234     | 246     | 279     | 149     | 140     | 234     | 246     |

*Note.* ITC = Infant-Toddler Checklist (part of the Communication and Symbolic Behavior Scales–Developmental Profile, Wetherby & Prizant, 2002); Soc = Social composite; Spe = Speech composite; Sym = Symbolic composite. Numbers after soc, spe, and sym represent age in months. \* $p < .05$ . \*\* $p < .01$ . \*\*\* $p < .001$ .

## Reference

Wetherby, A. M., & Prizant, B. M. (2002). *Communication and Symbolic Behavior Scales: Developmental Profile—First Normed Edition*. Baltimore, MD: Brookes.
