# Supplementary material
Source: publisher figshare collection journal article supplement (https://asha.figshare.com/articles/dataset/_/14963937)
Supplement: Supplementary file 3 [file 1]

**Supplemental Table SM4.** The coverage of the elements in the covariance matrix in the LGC model and follow-up assessments (% of the total sample of 427).

| Age<br>(mo.) | Early<br>communication | Age in months |      |      |      |      | Age (years; months) |      |      |      |      |
|--------------|------------------------|---------------|------|------|------|------|---------------------|------|------|------|------|
|              |                        | 6             | 9    | 12   | 15   | 18   | 2                   | 3    | 4;7  | 5;3  | 7;9  |
| 6            | ITC                    | 53.6          |      |      |      |      |                     |      |      |      |      |
| 9            | ITC                    | 47.3          | 47.5 |      |      |      |                     |      |      |      |      |
| 12           | ITC                    | 33.3          | 31.6 | 75.4 |      |      |                     |      |      |      |      |
| 15           | ITC                    | 35.4          | 33.3 | 64.9 | 71.4 |      |                     |      |      |      |      |
| 18           | ITC                    | 34.9          | 32.8 | 54.8 | 57.6 | 65.3 |                     |      |      |      |      |
| (yr.;mo.)    | Follow-up measures     |               |      |      |      |      |                     |      |      |      |      |
| 2            | MBCDI Vocabulary       | 8.7           | 8.2  | 23.2 | 23.7 | 23.0 | 24.4                |      |      |      |      |
| 2            | Inflections            | 8.4           | 8.2  | 23.0 | 23.4 | 22.7 | 24.1                |      |      |      |      |
| 2            | MSL                    | 8.2           | 8.0  | 22.2 | 22.7 | 22.0 | 23.4                |      |      |      |      |
| 3            | Boston Naming          | 10.8          | 10.8 | 25.5 | 25.3 | 24.6 |                     | 26.2 |      |      |      |
| 3            | PPVT-R                 | 10.5          | 10.5 | 25.3 | 25.1 | 24.4 |                     | 26.0 |      |      |      |
| 4;7          | FTF                    | 27.7          | 25.3 | 43.8 | 44.3 | 40.6 |                     |      | 63.0 |      |      |
| 5;3          | SI                     | 11.0          | 10.8 | 20.8 | 21.8 | 19.7 |                     |      |      | 23.0 |      |
| 5;3          | PPVT-R                 | 11.0          | 10.8 | 21.3 | 22.2 | 20.1 |                     |      |      | 23.4 |      |
| 5;3          | SC                     | 11.5          | 11.2 | 21.8 | 22.7 | 20.6 |                     |      |      | 23.9 |      |
| 5;3          | VF                     | 11.0          | 10.8 | 20.6 | 21.5 | 19.4 |                     |      |      | 22.7 |      |
| 5;3          | DSf                    | 11.5          | 11.2 | 21.5 | 22.5 | 20.4 |                     |      |      | 23.7 |      |
|              | DSb                    | 11.0          | 10.8 | 20.8 | 21.8 | 19.7 |                     |      |      | 23.2 |      |
| 5;3          | NWR                    | 11.0          | 10.8 | 20.8 | 21.8 | 19.7 |                     |      |      | 23.0 |      |
| 5;3          | SR                     | 11.2          | 11.0 | 21.3 | 22.2 | 20.1 |                     |      |      | 23.4 |      |
| 7;9          | CCC-II                 | 27.8          | 25.6 | 40.9 | 41.6 | 36.9 |                     |      |      |      | 58.8 |

*Note.* ITC = Infant-Toddler Checklist (part of the Communication and Symbolic Behavior Scales–Developmental Profile, Wetherby & Prizant, 2002); MBCDI = MacArthur–Bates Communicative Development Inventories (Fenson et al., 1994; Lyytinen, 1999); MSL = Maximum Sentence Length; PPVT-R = Peabody Picture Vocabulary Test–Revised (Dunn & Dunn, 1981); FTF = Five to Fifteen questionnaire (Kadesjö et al., 2004); SI = Similarities; SC = Sentence Comprehension; VF = Verbal Fluency; DSf = Digit Span Forward; DSb = Digit Span Backward; NWR = Nonword Repetition; SR = Sentence Repetition; CCC-II = Children’s Communication Checklist–Second Edition (Bishop, 2003; Norbury, Nash, Baird, & Bishop, 2004).

## References

- Bishop, D. V. M. (2003). *The Children's Communication Checklist—Second Edition*. London, United Kingdom: Harcourt Assessment.
- Dunn, L. M., & Dunn, D. M. (1981). *Peabody Picture Vocabulary Test—Revised*. Circle Pines, MN: AGS.
- Fenson, L., Dale, P. S., Reznick, J. S., Bates, E., Thal, D., & Pethick, S., . . . Stiles, J. (1994). Variability in early communicative development. *Monographs of the Society for Research in Child Development*, 59(5), 1–185.
- Kadesjö, B., Janols, L.-O., Korkman, M., Mickelsson, K., Strand, G., Trillingsgaard, A., & Gillberg, C. (2004). The FTF (Five to Fifteen): The development of a parent questionnaire for the assessment of ADHD and comorbid conditions. *European Child and Adolescent Psychiatry*, 13(Suppl. 3), 3–13. doi:10.1007/s00787-004-3002-2
- Kaplan, E., Goodglass, H., & Weintraub, S. (1983). *Boston Naming Test*. Philadelphia, PA: Lea & Febiger.
- Lyytinen, P. (1999). *Varhaisen kommunikaation ja kielen kehityksen arviointimenetelmä* [Finnish Manual for Communicative Development Inventories]. Jyväskylän yliopiston lapsitutkimuskeskus ja Niilo Mäki Instituutti. Jyväskylä, Finland: Yliopistopaino.
- Norbury, C. F., Nash, M., Baird, G., & Bishop, D. V. M. (2004). Using a parental checklist to identify diagnostic groups in children with communication impairment: A validation of the Children's Communication Checklist–2. *International Journal of Language and Communication Disorders*, 39, 345–364. doi:10.1080/13682820410001654883
- Wetherby, A. M., & Prizant, B. M. (2002). *Communication and Symbolic Behavior Scales: Developmental Profile—First Normed Edition*. Baltimore, MD: Brookes.
