# Supplementary material
Source: publisher figshare collection journal article supplement (https://asha.figshare.com/articles/dataset/_/14963937)
Supplement: Supplementary file 4 [file 1]

**Supplemental Table SM5.** The model fit indices for the LGC model and the regression models of the follow-up measurements.

| Age          | LGC model                                | $\chi^2$ | <i>df</i> | <i>p</i> | CFI   | TLI   | RMSEA | RMSEA 90%<br>CI | SRMR  |
|--------------|------------------------------------------|----------|-----------|----------|-------|-------|-------|-----------------|-------|
| 12–18 months | Early communication development          | 87.405   | 73        | 0.1198   | 0.991 | 0.987 | 0.021 | 0.000 0.037     | 0.083 |
|              | Outcome variables                        |          |           |          |       |       |       |                 |       |
| 2 years      | MCDI: Vocabulary, Inflections, MSL       | 153.548  | 112       | 0.0056   | 0.979 | 0.971 | 0.029 | 0.017 0.040     | 0.091 |
| 3 years      | Boston Naming, PPVT-R                    | 119.435  | 99        | 0.0793   | 0.988 | 0.984 | 0.022 | 0.000 0.035     | 0.083 |
| 4;7          | FTF Expressive, Receptive, Communication | 136.459  | 112       | 0.0579   | 0.987 | 0.982 | 0.022 | 0.000 0.033     | 0.078 |
| 5;3          | Psychometric tests: Language, Memory     | 258.160  | 207       | 0.0090   | 0.973 | 0.967 | 0.024 | 0.018 0.033     | 0.089 |
| 1st grade    | CCC-II: Language, Communication          | 236.476  | 206       | 0.0714   | 0.991 | 0.988 | 0.018 | 0.000 0.028     | 0.071 |

*Note.* A nonsignificant chi-square test ( $p > .05$ ), CFI and TLI values at or above .95, RMSEA below .06, and SRMR below .08 serve as guidelines for determining good model fit (Hu & Bentler, 1999; Marsh, Hau, & Wen, 2004). LGC = latent growth curve; CFI = comparative fit index; TLI = Tucker–Lewin index; RMSEA = root mean square error of approximation; CI = confidence interval; SRMR = standardized root mean square error of approximation; MCDI = MacArthur–Bates Communicative Development Inventories (Fenson et al., 1994; Lyytinen, 1999); MSL = Maximum Sentence Length; PPVT-R = Peabody Picture Vocabulary Test–Revised (Dunn & Dunn, 1981); FTF = Five to Fifteen (Kadesjö et al., 2004); CCC-II = Children’s Communication Checklist–Second Edition (Bishop, 2003; Norbury, Nash, Baird, & Bishop, 2004).

## References

- Bishop, D. V. M. (2003). *The Children’s Communication Checklist–Second Edition*. London, United Kingdom: Harcourt Assessment.
- Dunn, L. M., & Dunn, D. M. (1981). *Peabody Picture Vocabulary Test–Revised*. Circle Pines, MN: AGS.
- Fenson, L., Dale, P. S., Reznick, J. S., Bates, E., Thal, D., & Pethick, S., . . . Stiles, J. (1994). Variability in early communicative development. *Monographs of the Society for Research in Child Development*, 59(5), 1–185.
- Hu, L., & Bentler, P. M. (1999). Cutoff criteria for fit indexes in covariance structure analysis: Conventional criteria versus new alternatives. *Structural Equation Modeling*, 6, 1–55. doi:10.1080/10705519909540118

- Kadesjö, B., Janols, L.-O., Korkman, M., Mickelsson, K., Strand, G., Trillingsgaard, A., & Gillberg, C. (2004). The FTF (Five to Fifteen): The development of a parent questionnaire for the assessment of ADHD and comorbid conditions. *European Child and Adolescent Psychiatry*, 13(Suppl. 3), 3–13. doi:10.1007/s00787-004-3002-2
- Kaplan, E., Goodglass, H., & Weintraub, S. (1983). *Boston Naming Test*. Philadelphia, PA: Lea & Febiger.
- Lyytinen, P. (1999). *Varhaisen kommunikaation ja kielen kehityksen arviointimenetelmä* [Finnish Manual for Communicative Development Inventories]. Jyväskylän yliopiston lapsitutkimuskeskus ja Niilo Mäki Instituutti. Jyväskylä, Finland: Yliopistopaino.
- Marsh, H. W., Hau, K.-T., & Wen, Z. (2004). In search of golden rules: Comment on hypothesis-testing approaches for setting cutoff values for fit indexes and dangers in overgeneralizing Hu and Bentler's (1999) findings. *Structural Equation Modeling*, 11, 320–341. doi:10.1207/s15328007sem1103\_2
- Norbury, C. F., Nash, M., Baird, G., & Bishop, D. V. M. (2004). Using a parental checklist to identify diagnostic groups in children with communication impairment: A validation of the Children's Communication Checklist–2. *International Journal of Language and Communication Disorders*, 39, 345–364. doi:10.1080/13682820410001654883
