# Supplementary material
Source: publisher figshare collection journal article supplement (https://asha.figshare.com/articles/dataset/_/14963937)
Supplement: Supplementary file 5 [file 1]

**Supplemental Table SM1.** Comparisons of the ITC scores at ages 12, 15, and 18 months of age between the children participating and not participating in the follow-ups.

|           | ITC at age 12 months        |             |             |             | ITC at age 15 months        |             |             |             | ITC at age 18 months        |             |             |             |
|-----------|-----------------------------|-------------|-------------|-------------|-----------------------------|-------------|-------------|-------------|-----------------------------|-------------|-------------|-------------|
|           | <i>n</i> (data/<br>no data) | Soc         | Spe<br>F    | Sym         | <i>n</i> (data/<br>no data) | Soc         | Spe<br>F    | Sym         | <i>n</i> (data/<br>no data) | Soc         | Spe<br>F    | Sym         |
| 2 years   | 99/223                      | <i>n.s.</i> | <i>n.s.</i> | <i>n.s.</i> | 101/204                     | <i>n.s.</i> | 17.6*       | <i>n.s.</i> | 98/181                      | <i>n.s.</i> | <i>n.s.</i> | <i>n.s.</i> |
| 3 years   | 109/213                     | <i>n.s.</i> | <i>n.s.</i> | <i>n.s.</i> | 108/197                     | 12.3*       | 15.3*       | <i>n.s.</i> | 105/174                     | <i>n.s.</i> | 12.9*       | <i>n.s.</i> |
| 4;7       | 206/116                     | <i>n.s.</i> | <i>n.s.</i> | <i>n.s.</i> | 208/97                      | <i>n.s.</i> | <i>n.s.</i> | <i>n.s.</i> | 191/88                      | <i>n.s.</i> | <i>n.s.</i> | <i>n.s.</i> |
| 5;3       | 93/229                      | <i>n.s.</i> | <i>n.s.</i> | <i>n.s.</i> | 97/208                      | <i>n.s.</i> | <i>n.s.</i> | <i>n.s.</i> | 88/191                      | <i>n.s.</i> | <i>n.s.</i> | <i>n.s.</i> |
| 1st grade | 190/132                     | <i>n.s.</i> | <i>n.s.</i> | <i>n.s.</i> | 193/112                     | <i>n.s.</i> | <i>n.s.</i> | <i>n.s.</i> | 171/108                     | <i>n.s.</i> | <i>n.s.</i> | <i>n.s.</i> |

*Note.* ITC = Infant-Toddler Checklist (part of the Communication and Symbolic Behavior Scales–Developmental Profile [CSBS-DP], Wetherby & Prizant, 2002); Soc = Social composite; Spe = Speech composite; Sym = Symbolic composite.

\*  $p < .001$ .

## Reference

Wetherby, A. M., & Prizant, B. M. (2002). *Communication and Symbolic Behavior Scales: Developmental Profile—First Normed Edition*. Baltimore, MD: Brookes.
